# Supplementary material for: Visualization of size-dependent tumour retention of PEGylated nanographene oxide via SPECT imaging
Source: Royal Society of Chemistry journal article supplement (doi:10.1039/c6tb01892k), 2016-01-01
Supplement: c6tb01892k1.pdf [file c6tb01892k1.pdf]

## Supporting Information

### Visualization of Size-Dependent Tumour Retention of PEGylated

### Nanographene Oxide via SPECT Imaging

Tianye Cao,<sup>‡a</sup> Peihong You,<sup>‡ab</sup>, Xiaobao Zhou,<sup>ab</sup> Jianmin Luo,<sup>a</sup> Xiaoping Xu,<sup>a</sup> Zhiguo Zhou,<sup>b</sup> Shiping Yang,<sup>b</sup> Yingjian Zhang,<sup>a</sup> Hong Yang<sup>\*b</sup> and Mingwei Wang<sup>\*a</sup>

<sup>a</sup> Department of Nuclear Medicine, Fudan University Shanghai Cancer Center;  
Department of Oncology, Shanghai Medical College, Fudan University; Center for  
Biomedical Imaging, Fudan University; Shanghai Engineering Research Center for  
Molecular Imaging Probes, No. 270 Dong'An Road, Shanghai 200032, China

<sup>b</sup> The Key Laboratory of Resource Chemistry of Ministry of Education, Shanghai Key  
Laboratory of Rare Earth Functional Materials, and Shanghai Municipal Education  
Committee Key Laboratory of Molecular Imaging Probes and Sensors, Shanghai  
Normal University, No. 100, Guilin Road, Shanghai 200234, China

<sup>‡</sup> These authors contributed equally to this work.

E-mail addresses: [yanghong@shnu.edu.cn](mailto:yanghong@shnu.edu.cn) (H Yang), [wang.mingwei88@163.com](mailto:wang.mingwei88@163.com)  
(MW Wang)

**Table S1.** The sizes of usNGO, usNGO-PEG, NGO and NGO-PEG measured by AFM (corresponding to Fig. 1), TEM (corresponding to Figure S1), DLS (corresponding to Fig. 3b) with PDI, and the  $\zeta$ -potential values in deionized water, respectively.

|                  | AFM (nm) | TEM (nm) | DLS (nm)               | PDI   | $\zeta$ -potential (mV) |
|------------------|----------|----------|------------------------|-------|-------------------------|
| <b>usNGO</b>     | 26 ± 10  | 20 ± 4   | 173 ± 54 <sup>∇</sup>  | 0.768 | -20.8                   |
| <b>usNGO-PEG</b> | -        | 28 ± 5   | 28 ± 10                | 0.139 | -1.16                   |
| <b>NGO</b>       | 70 ± 36  | 80 ± 40  | 244 ± 137 <sup>∇</sup> | 0.79  | -25.7                   |
| <b>NGO-PEG</b>   | -        | 80 ± 45  | 91 ± 34                | 0.234 | -2.38                   |

<sup>∇</sup>The size of usNGO and NGO measured by DLS was very large because they aggregated.

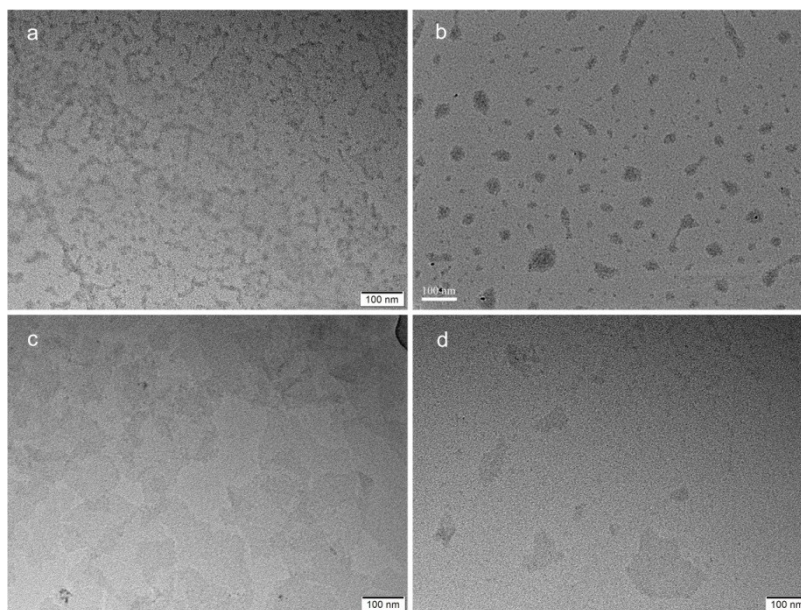

**Fig. S1** TEM images of usNGO (a), usNGO-PEG (b), NGO (c) and NGO-PEG (d), respectively, dispersed in H<sub>2</sub>O.

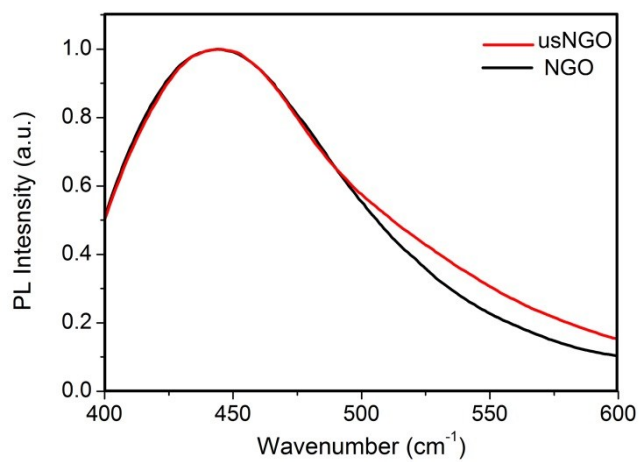

**Fig. S2.** PL emission spectra of usNGO and NGO ( $\lambda_{\text{ex}} = 360 \text{ nm}$ ).

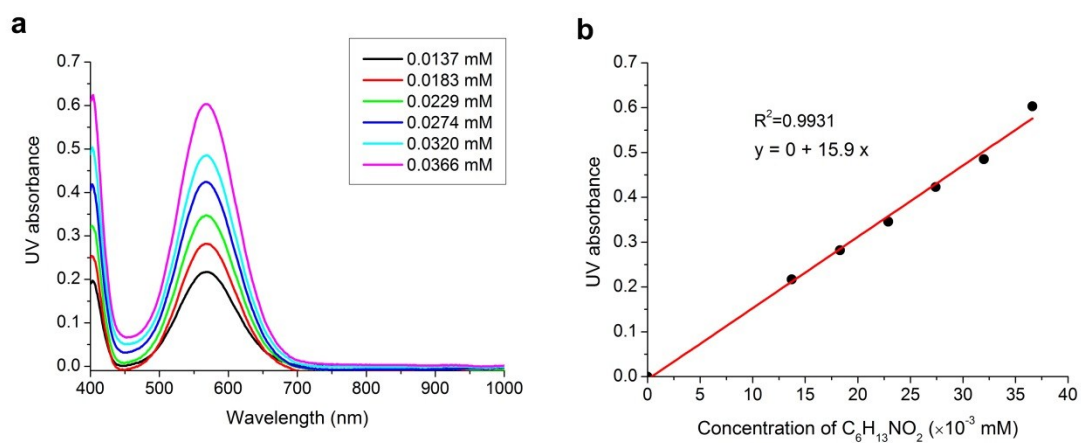

**Fig. S3.** The standard ninhydrin quantification protocol. The UV absorbance (570 nm) of L-leucine with different concentration (a) and the fit linear (b).

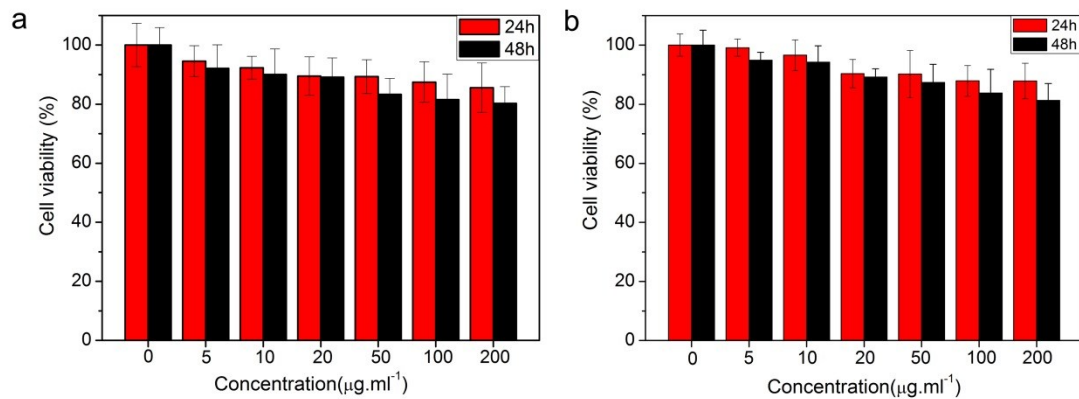

**Fig. S4** Relative cell viability of 4T1 after 24 h and 48 h incubation with usNGO-PEG (a) and NGO-PEG (b). Error bars were based on triple samples.

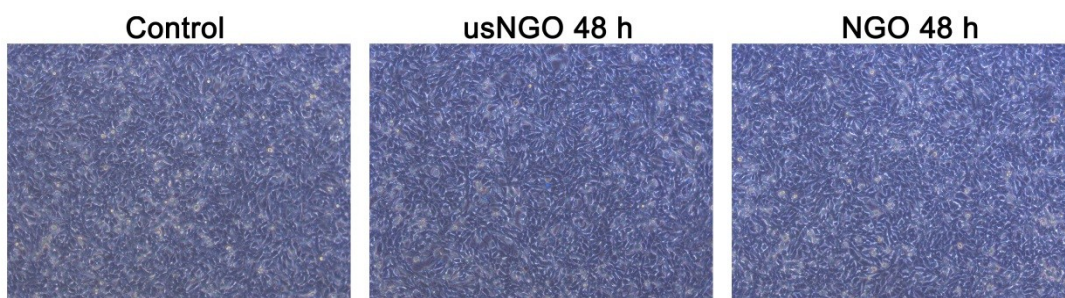

**Fig. S5** The 4T1 cell morphology visualized by confocal microscopy after incubated at 37 °C for 48 h with usNGO-PEG and NGO-PEG (the concentration of 200  $\mu\text{g/mL}$ ), respectively. Microscope objective:  $\times 10$ . White light.

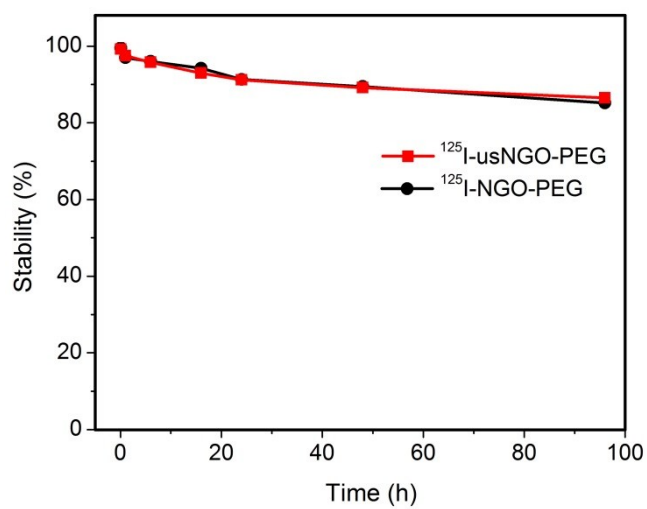

**Fig. S6** The stability of  $^{125}\text{I}$ -radiolabeled usNGO-PEG and NGO-PEG in serum solution (50%, pH 7.4). The mixtures were incubated at 37 °C for 1, 6, 16, 24, 48 and 96 h, and the solution was determined by radioactive thin layer chromatography (Radio-TLC).
